# Supplementary material
Source: publisher figshare collection journal article supplement (https://sage.figshare.com/ndownloader/files/16407125)
Supplement: Supplementary file 1 [file 16407125]

## Appendix – Proofs of Theorems 1-3

### Proof of Theorem 1

Let  $\hat{C} = I(T(X) \geq u)$  and consider the *PPV* of this classifier,

$$PPV(u) = \frac{\pi_1 P(T(X) \geq u | C = 1)}{\pi_1 P(T(X) \geq u | C = 1) + \pi_0 P(T(X) \geq u | C = 0)} .$$

We will first show  $PPV(u)$  is an increasing function of  $u$  by equivalently showing that

$r(u) = \frac{P(T(X) \geq u | C = 1)}{P(T(X) \geq u | C = 0)}$  is an increasing function of  $u$ . With  $T(X) = \log(h_1(X) / h_0(X))$ ,

$$r(u) = \frac{\int_{T(x) \geq u} h_1(x) dx}{\int_{T(x) \geq u} h_0(x) dx} = \frac{\int_{T(x) \geq u} (h_1(x) / h_0(x)) h_0(x) dx}{\int_{T(x) \geq u} h_0(x) dx} = E \left\{ \frac{h_1(x)}{h_0(x)} \middle| C = 0, T(X) \geq u \right\} .$$

For any  $u_1 < u_2$ , it follows from the law of total probability that

$$\begin{aligned} r(u_1) &= E \left\{ \frac{h_1(x)}{h_0(x)} \middle| C = 0, T(X) \geq u_1 \right\} \\ &= P\{T(X) \geq u_2 | C = 0, T(X) \geq u_1\} \times E \left\{ \frac{h_1(x)}{h_0(x)} \middle| C = 0, T(X) \geq u_2 \right\} \\ &\quad + P\{u_1 \leq T(X) < u_2 | C = 0, T(X) \geq u_1\} \times E \left\{ \frac{h_1(x)}{h_0(x)} \middle| C = 0, u_1 \leq T(X) < u_2 \right\} \\ &= \omega r(u_2) + (1 - \omega) r^* \end{aligned}$$

where  $\omega = P\{T(X) \geq u_2 | C = 0, T(X) \geq u_1\}$  and  $r^* = E \left\{ \frac{h_1(x)}{h_0(x)} \middle| C = 0, u_1 \leq T(X) < u_2 \right\}$ . By

definition,

$$r(u_2) = E \left\{ \frac{h_1(x)}{h_0(x)} \middle| C = 0, T(X) \geq u_2 \right\} \geq e^{u_2} \geq E \left\{ \frac{h_1(x)}{h_0(x)} \middle| C = 0, u_1 < T(X) < u_2 \right\} = r^* .$$

Because  $r(u_1)$  is a weighted average of  $r(u_2)$  and  $r^*$ , this implies  $r(u_1) \leq r(u_2)$  and this shows that  $r(u)$  and hence  $PPV(u)$  are increasing in  $u$ . Similarly it can be shown that  $NPV(u)$  is decreasing in  $u$  and it therefore follows that the PROC is monotone.

### Proof of Theorem 2

If  $T(X)$  is the log-likelihood ratio then Theorem 1 implies the PROC curve is increasing, which implies<sup>16</sup> that  $h_G(u) \leq h_F(u)$  and  $\bar{h}_F(u) \leq \bar{h}_G(u)$  hold. The theorem then follows from necessary and sufficient conditions given in section 4.

### Proof of Theorem 3

Define  $R_1$  to be the set of all  $(x_1, x_2)$  at the second stage for which the classifier predicts class 1, and let  $R_1^c$  denote the complement of  $R_1$ . Then,

$$\begin{aligned}
 OER_2(u) &= \pi_0 FPR_2(u) + \pi_1 FNR_2(u) \\
 &= \pi_0 P(T_1(X_1) \geq u_1 | C = 0) + \pi_0 P(u_0 < T_1(X_1) < u_1, (X_1, X_2) \in R_1 | C = 0) \\
 &\quad + \pi_1 P(T_1(X_1) < u_0 | C = 1) + \pi_1 P(u_0 < T_1(X_1) < u_1, (X_1, X_2) \in R_1^c | C = 1) \\
 &= \pi_0 P(T_1(X_1) \geq u_1 | C = 0) + \pi_1 P(T_1(X_1) < u_0 | C = 1) + \pi_1 P(u_0 < T_1(X_1) < u_1 | C = 1) \\
 &\quad + \iint_{R_1} I\{u_0 < T_1(x_1) < u_1\} \{\pi_0 h_0(x_1, x_2) - \pi_1 h_1(x_1, x_2)\} dx_1 dx_2,
 \end{aligned}$$

It is clear that to minimize  $OER_2(u)$  we should take  $R_1$  to include all points  $(x_1, x_2)$  for which  $h_1(x_1, x_2) / h_0(x_1, x_2) > \pi_0 / \pi_1$ , which is equivalent to the claim in the theorem.
